# Supplementary material for: Highly flexible, mesoporous structured, and metallic Cu-doped C/SiO2 nanofibrous membranes for efficient catalytic oxidative elimination of antibiotic pollutants
Source: Royal Society of Chemistry journal article supplement (doi:10.1039/c9nr04118d), 2019-01-01
Supplement: c9nr04118d1.pdf [file c9nr04118d1.pdf]

## Supporting Information for

### **Highly flexible, mesoporous structured, and metallic Cu-doped C/SiO<sub>2</sub> nanofibrous membranes for efficient catalytic oxidative elimination of antibiotic pollutants**

Haoru Shan,<sup>ac</sup> Xiangyang Dong,<sup>b</sup> Xiaota Cheng,<sup>ac</sup> Yang Si,<sup>\*ac</sup> Jianyong Yu,<sup>\*c</sup> and Bin Ding<sup>ac</sup>

<sup>a</sup> State Key Laboratory for Modification of Chemical Fibers and Polymer Materials, College of Textiles, Donghua University, Shanghai 201620, China

<sup>b</sup> School of Resource and Environmental Science, Wuhan University, Wuhan 430079, China

<sup>c</sup> Innovation Center for Textile Science and Technology, Donghua University, Shanghai 200051, China

\* Corresponding authors:

*E-mail address:* yangsi@dhu.edu.cn (Prof. Y. Si); yujy@dhu.edu.cn (Prof. J. Yu)

## Supplementary Methods

### Fractal Dimension Calculation

The fractal dimension ( $D$ ) was calculated from the corresponding  $N_2$  adsorption isotherms according to the following Frenkel-Halsey-Hill (FHH) equation:

$$\ln(V/V_{mono}) = A \left[ \ln(\ln(P_0/P)) \right] + C \quad (1)$$

where  $V$  is  $N_2$  adsorption capacity at each equilibrium pressure;  $V_{mono}$  is the monolayer adsorption capacity;  $P_0$  and  $P$  are the saturation and equilibrium pressure, respectively; and plots of  $\ln(V/V_{mono})$  versus  $\ln(\ln(P_0/P))$  showing a linear trend were reconstructed and the  $D$  could be calculated by utilizing the expression:  $D = A + 3$ , which was according to the dominant forces of liquid-gas surface tension at high coverage.

### Apparent Rate Constants Determination

The pseudo-first-order (eqn (2)) and second-order (eqn (3)) kinetic models are described in the following way:

$$\ln \frac{C_t}{C_0} = -k_{obs}t \quad (2)$$

$$\frac{1}{C_t} - \frac{1}{C_0} = kt \quad (3)$$

where  $C_0$  ( $mg L^{-1}$ ) is the initial concentration of TCH,  $C_t$  ( $mg L^{-1}$ ) is the residual concentration of TCH at  $t$  (min), and  $k_{obs}$  ( $min^{-1}$ ) is the reaction rate constant of the pseudo-first-order model, respectively;  $k$  ( $L mg^{-1} min^{-1}$ ) is the rate constant of a second-order reaction.

### Activation Energy Calculation

The correlation between the rate constants and reaction temperature was fitted by the Arrhenius equation (eqn(4)).

$$\ln k = \ln A - \frac{E_a}{RT} \quad (4)$$

where  $k$  is rate constant of pseudo-second-order reaction ( $\text{L mg}^{-1} \text{min}^{-1}$ ),  $A$  is the pre-exponential factor,  $E_a$  ( $\text{kJ mol}^{-1}$ ) is the Arrhenius activation energy or apparent activation energy,  $R$  is molar gas constant of  $8.814472 \times 10^{-3} \text{ kJ mol}^{-1} \text{ K}^{-1}$ , and  $T$  is the reaction temperature (K).

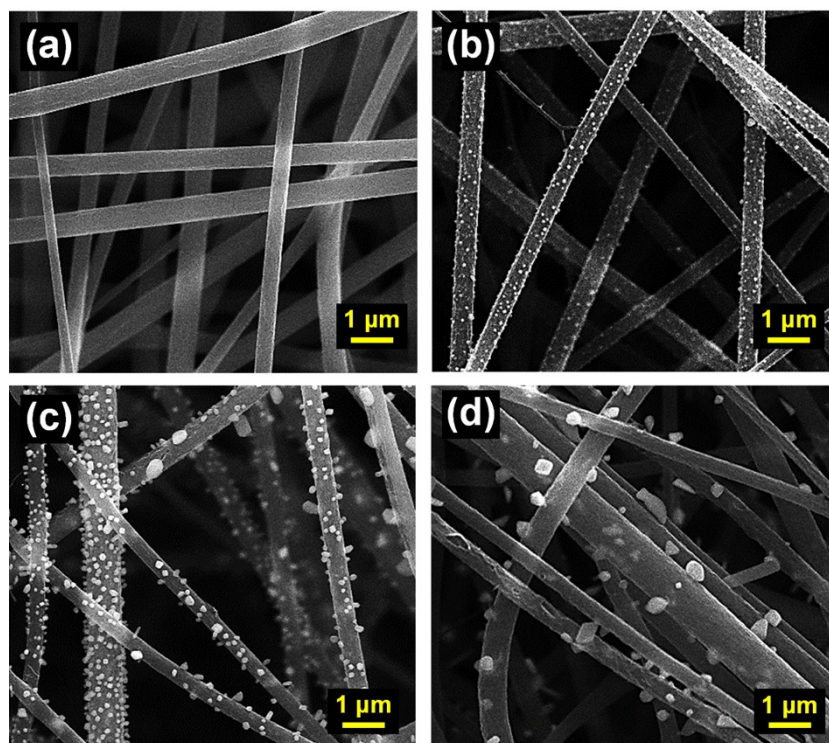

**Fig. S1.** SEM images of (a) Cu@C/SiO<sub>2</sub>-1 NFMs, (b) Cu@C/SiO<sub>2</sub>-2 NFMs, (c) Cu@C/SiO<sub>2</sub>-3 NFMs, and (d) Cu@C/SiO<sub>2</sub>-4 NFMs.

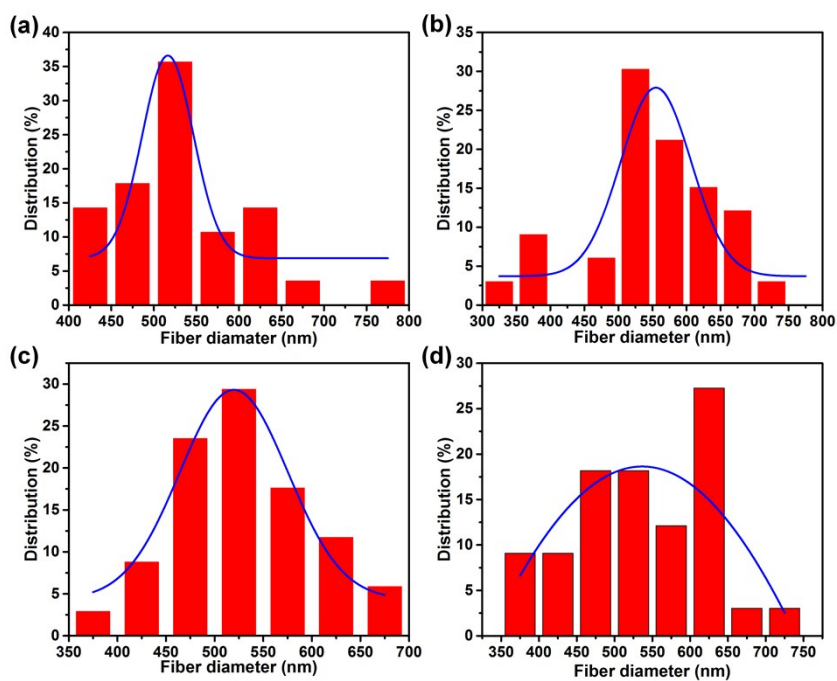

**Fig. S2.** Histograms of fiber diameter distribution for (a) Cu@C/SiO<sub>2</sub>-1 NFMs, (b) Cu@C/SiO<sub>2</sub>-2 NFMs, (c) Cu@C/SiO<sub>2</sub>-3 NFMs, and (d) Cu@C/SiO<sub>2</sub>-4 NFMs.

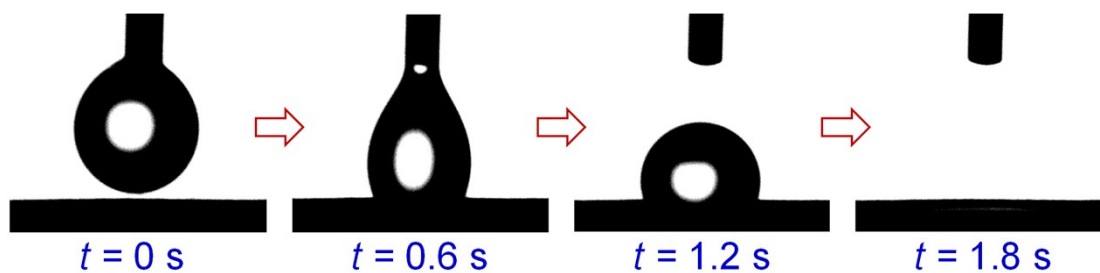

**Fig. S3.** Photographs of dynamic measurements of water permeation on the Cu@C/SiO<sub>2</sub>-3 NFMs.

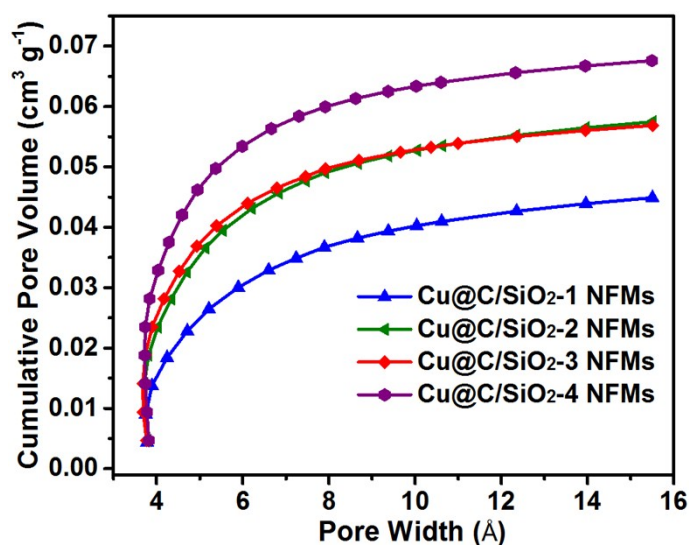

**Fig. S4.** Horvath-Kawazoe cumulative pore volume plots of the relevant Cu@C/SiO<sub>2</sub> NFMs.

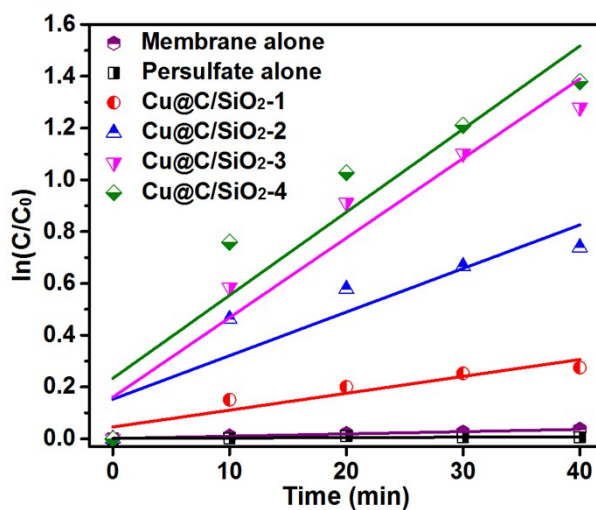

**Fig. S5.** Pseudo-first-order kinetic plots of the relevant Cu@C/SiO<sub>2</sub> NFMs.

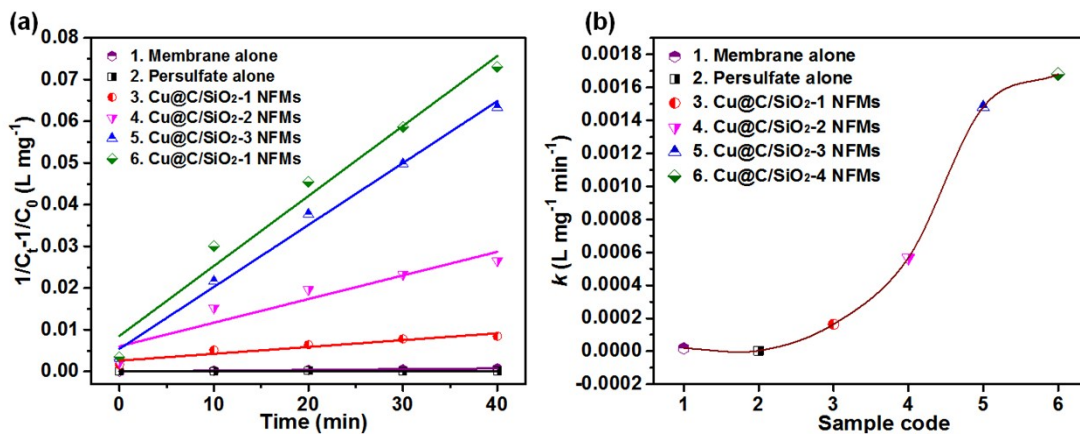

**Fig. S6.** (a) Pseudo-second-order kinetic plots of the relevant Cu@C/SiO<sub>2</sub> NFMs. (b)

The calculated rate constant of Pseudo-second-order kinetics.

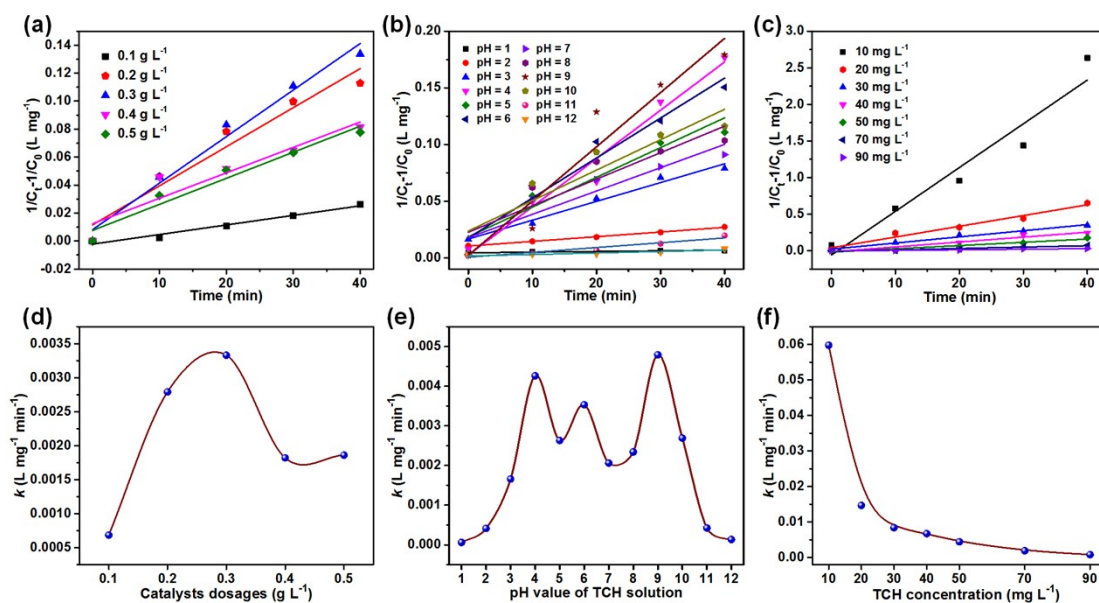

**Fig. S7.** The pseudo-second-order kinetics for catalyst at various reaction parameters:

(a) catalyst dosages, (b) pH values, and (c) TCH concentrations. (d-f) The degradation rates for the corresponding reaction parameters.

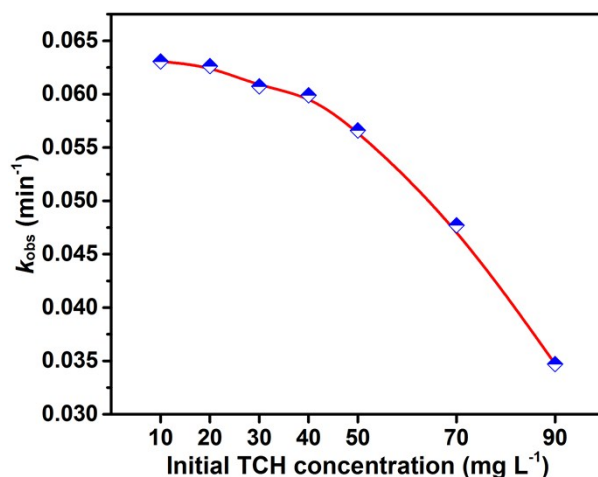

**Fig. S8.** Effect of initial concentration of TCH aqueous solution on degradation rate.

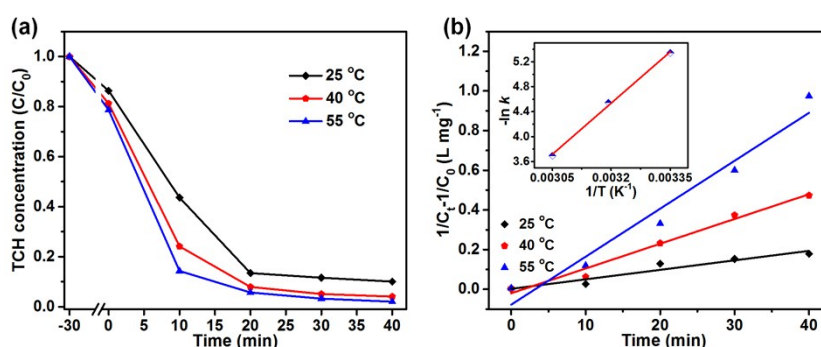

**Fig. S9.** (a) Effect of reaction temperature on TCH degradation. (b)  $1/C_t - 1/C_0$  versus reaction time based on the effect of reaction temperature. Inset indicates the Arrhenius curve. Reaction conditions: [Catalyst dosages] =  $0.3 \text{ g L}^{-1}$ , [persulfate dosages] =  $0.3 \text{ g L}^{-1}$ , [pH value] = 9, [TCH concentration] =  $50 \text{ mg L}^{-1}$ .

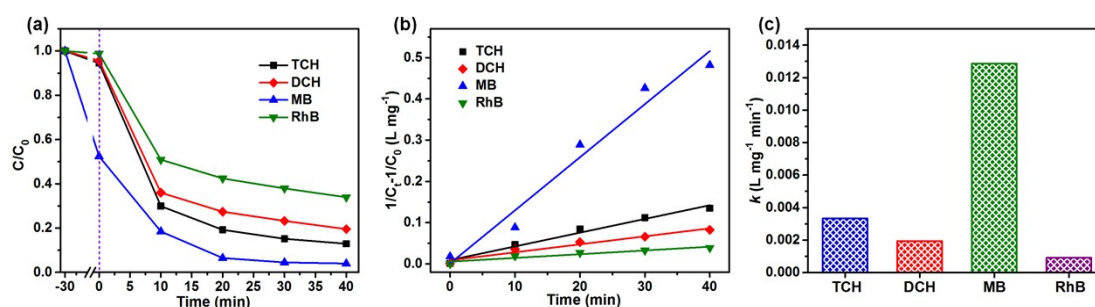

**Fig. S10.** (a) Oxidation degradation properties of TCH, DCH, MB, and RhB through Cu@C/SiO<sub>2</sub> NFMs-persulfate system. (b) The corresponding pseudo-second-order kinetic plots. (c) The degradation rate for TCH, DCH, MB, and RhB.



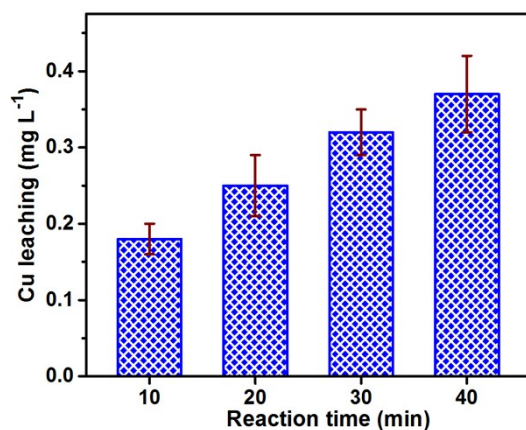

**Fig. S11.** Cu leaching during the reaction in the Cu@C/SiO<sub>2</sub> NFMs-persulfate system.

Reaction conditions: [Cu@C/SiO<sub>2</sub> NFMs] = 0.3 g L<sup>-1</sup>, [persulfate] = 0.3 g L<sup>-1</sup>, pH = 7.

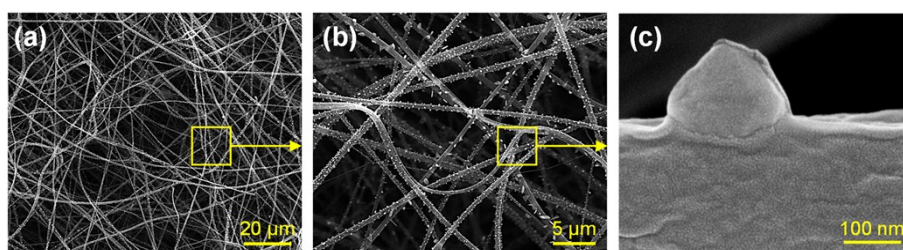

**Fig. S12.** (a-c) SEM images of Cu@C/SiO<sub>2</sub>-3 NFMs after continuous degradation processes at gradually increased magnifications.

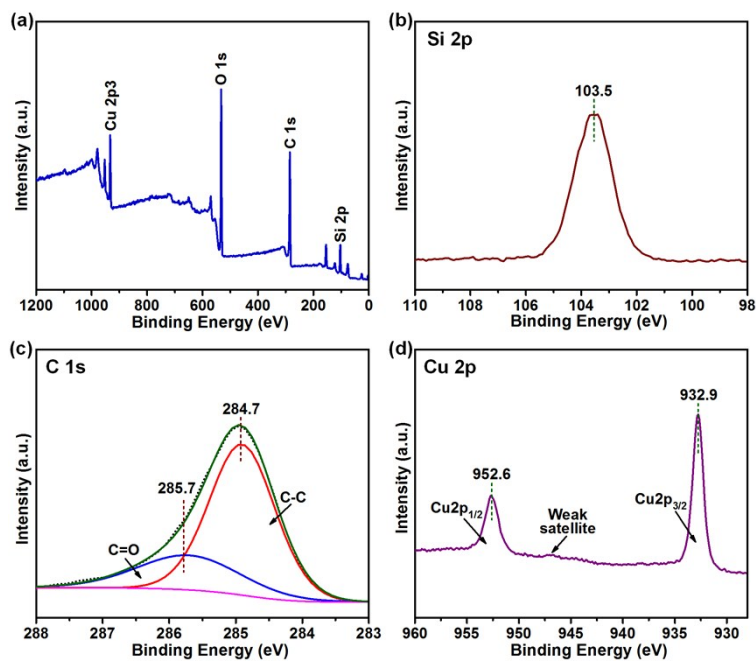

**Fig. S13.** XPS analysis of the Cu@C/SiO<sub>2</sub>-3 NFMs after use, (a) XPS survey, (b) Si 2p, (c) C 1s, and (d) Cu 2p spectra.



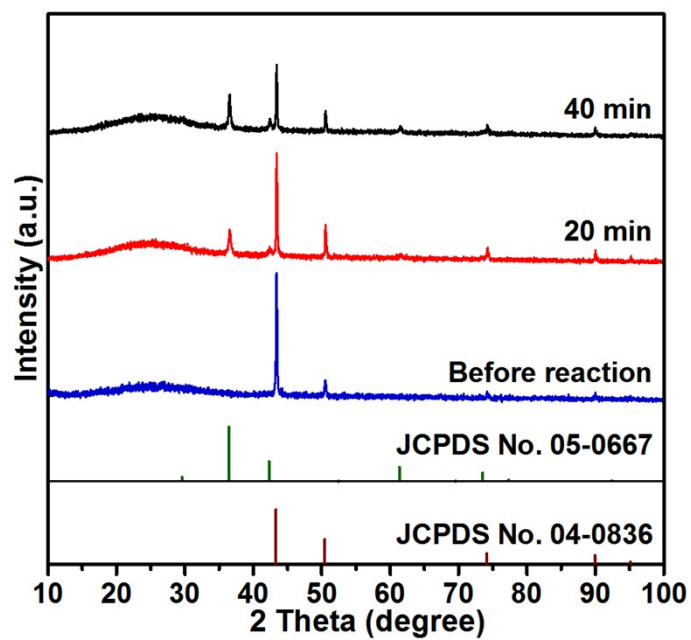

Fig. S14. XRD patterns of Cu@C/SiO<sub>2</sub>-3 NFMs before and after reaction.

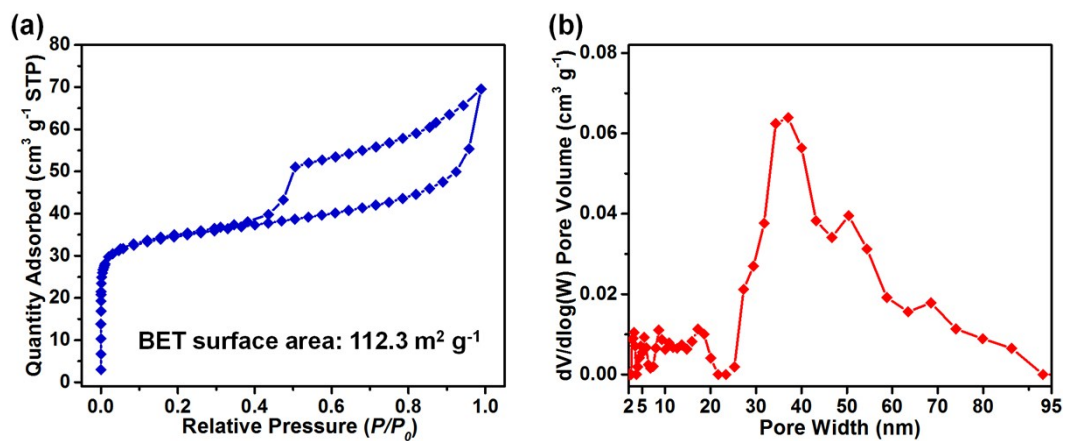

Fig. S15. (a) Nitrogen adsorption-desorption isotherms and (b) pore size distribution curves of Cu@C/SiO<sub>2</sub>-3 NFMs after degradation processes.

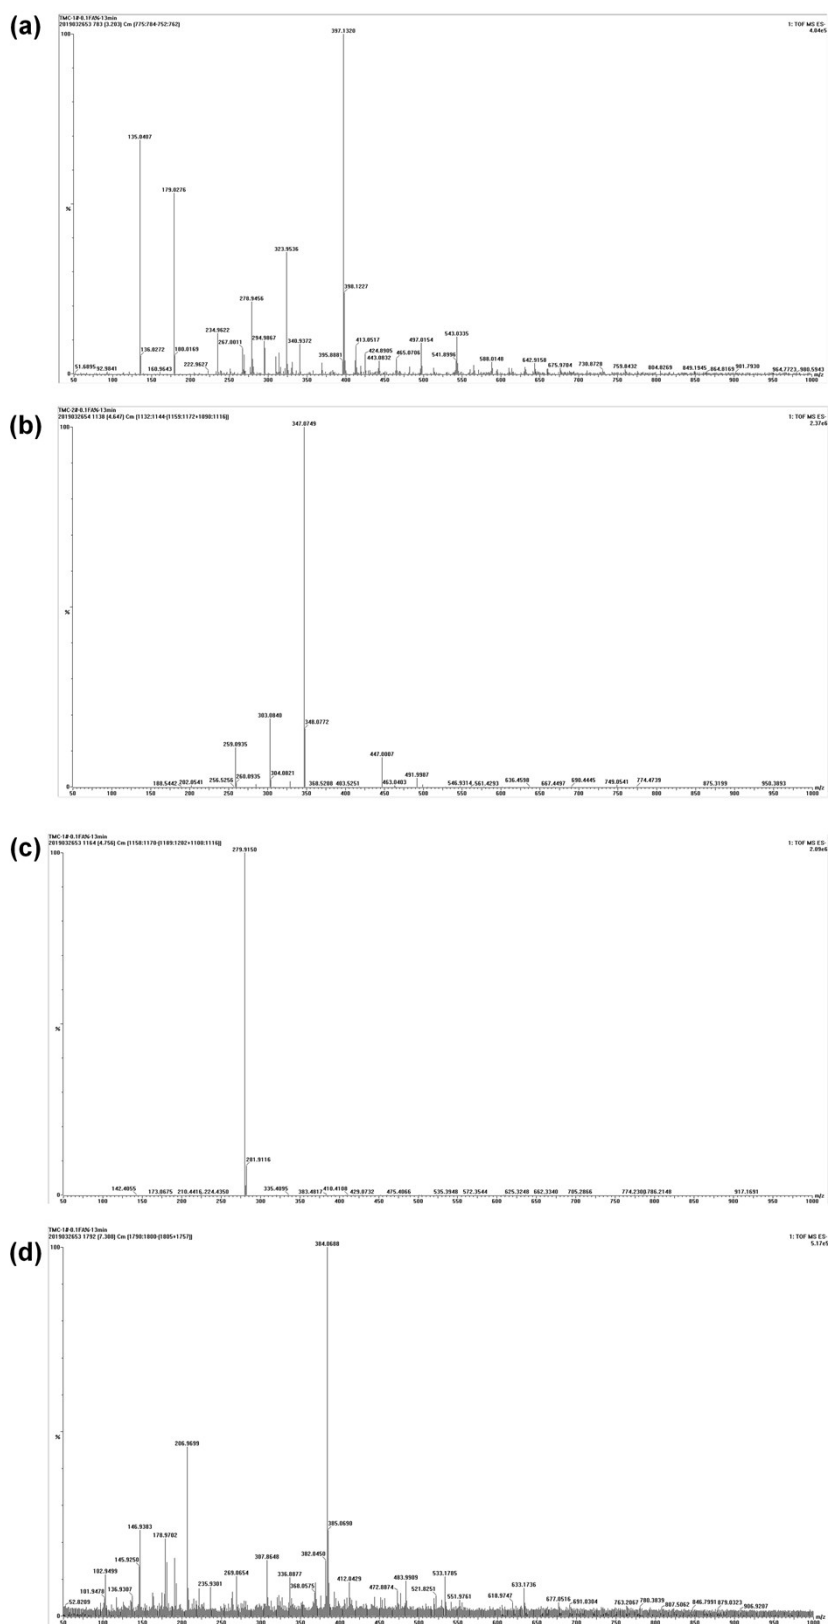

**Fig. S16.** UPLC-MS spectra of the residual TCH solution during catalyzed *via* Cu@C/SiO<sub>2</sub>-3 NFM/persulfate system.

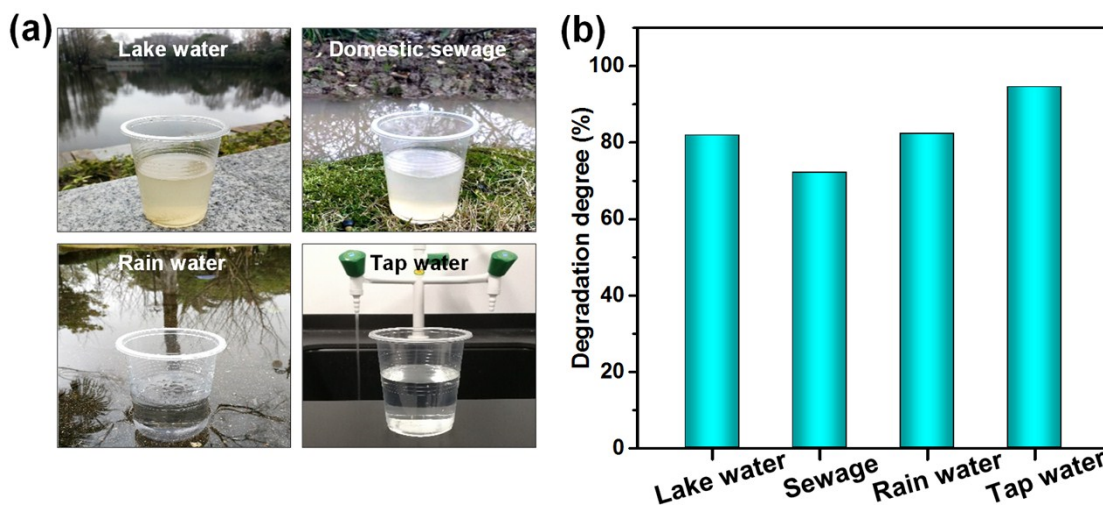

**Fig. S17.** (a) Natural water samples obtained from lake water, domestic sewage, rainwater, and tap water, respectively. (b) The corresponding TCH degradation performance based on the natural water samples.

**Table S1.** Porous structural parameters of the relevant Cu@C/SiO<sub>2</sub> NFMs.

| Sample name                   | $S_{\text{BET}}^a$<br>(m <sup>2</sup> g <sup>-1</sup> ) | $V_{\text{total}}^b$<br>(cm <sup>3</sup> g <sup>-1</sup> ) | $V_{\text{meso}}^c$<br>(cm <sup>3</sup> g <sup>-1</sup> ) | $V_{\text{micro}}^d$<br>(cm <sup>3</sup> g <sup>-1</sup> ) | $PVF_{\text{meso}}^e$<br>(%) |
|-------------------------------|---------------------------------------------------------|------------------------------------------------------------|-----------------------------------------------------------|------------------------------------------------------------|------------------------------|
| Cu@C/SiO <sub>2</sub> -1 NFMs | 94.56                                                   | 0.164                                                      | 0.119                                                     | 0.045                                                      | 72.6                         |
| Cu@C/SiO <sub>2</sub> -2 NFMs | 115.87                                                  | 0.146                                                      | 0.089                                                     | 0.057                                                      | 61.0                         |
| Cu@C/SiO <sub>2</sub> -3 NFMs | 118.66                                                  | 0.143                                                      | 0.086                                                     | 0.057                                                      | 60.1                         |
| Cu@C/SiO <sub>2</sub> -4 NFMs | 133.64                                                  | 0.157                                                      | 0.090                                                     | 0.067                                                      | 57.3                         |

<sup>a</sup>Specific surface area was calculated *via* BET method. <sup>b</sup>Total pore volume was calculated at P/P<sub>0</sub>=0.99. <sup>c</sup> $V_{\text{meso}}$  was calculated through NLDFT model. <sup>d</sup> $V_{\text{micro}}$  was calculated through HK model. <sup>e</sup> $PVF_{\text{meso}}$  indicates the pore volume fraction of mesopores.

**Table S2.** Degradation kinetics parameters for for various Cu@C/SiO<sub>2</sub> NFMs.

| Sample name                      | Pseudo-first-order model              |       | Pseudo-second-order model                   |       |
|----------------------------------|---------------------------------------|-------|---------------------------------------------|-------|
|                                  | $k_{\text{obs}}$ (min <sup>-1</sup> ) | $R^2$ | $k$ (L mg <sup>-1</sup> min <sup>-1</sup> ) | $R^2$ |
| 1. Membrane alone                | 0.00089                               | 0.961 | 0.00002                                     | 0.988 |
| 2. Persulfate alone              | 0.00015                               | 0.937 | 0.00003                                     | 0.958 |
| 3. Cu@C/SiO <sub>2</sub> -1 NFMs | 0.0071                                | 0.925 | 0.00016                                     | 0.952 |
| 4. Cu@C/SiO <sub>2</sub> -2 NFMs | 0.01706                               | 0.924 | 0.00056                                     | 0.957 |
| 5. Cu@C/SiO <sub>2</sub> -3 NFMs | 0.03121                               | 0.934 | 0.00148                                     | 0.991 |
| 6. Cu@C/SiO <sub>2</sub> -4 NFMs | 0.03235                               | 0.916 | 0.00168                                     | 0.969 |

**Table S3.** Degradation kinetics parameters for different catalyst dosages.

| Catalysts dosages<br>(g L <sup>-1</sup> ) | Pseudo-first-order model       |       | Pseudo-second-order model                   |       |
|-------------------------------------------|--------------------------------|-------|---------------------------------------------|-------|
|                                           | $k_{obs}$ (min <sup>-1</sup> ) | $R^2$ | $k$ (L mg <sup>-1</sup> min <sup>-1</sup> ) | $R^2$ |
| 0.1                                       | 0.02179                        | 0.978 | 0.00068                                     | 0.987 |
| 0.2                                       | 0.04286                        | 0.747 | 0.00279                                     | 0.931 |
| 0.3                                       | 0.04661                        | 0.800 | 0.00333                                     | 0.974 |
| 0.4                                       | 0.03403                        | 0.666 | 0.00182                                     | 0.852 |
| 0.5                                       | 0.03557                        | 0.781 | 0.00186                                     | 0.943 |

**Table S4.** Degradation kinetics parameters for different pH values.

| pH value | Pseudo-first-order model       |       | Pseudo-second-order model                   |       |
|----------|--------------------------------|-------|---------------------------------------------|-------|
|          | $k_{obs}$ (min <sup>-1</sup> ) | $R^2$ | $k$ (L mg <sup>-1</sup> min <sup>-1</sup> ) | $R^2$ |
| 1        | 0.00234                        | 0.906 | 0.00006                                     | 0.915 |
| 2        | 0.01079                        | 0.909 | 0.00041                                     | 0.997 |
| 3        | 0.02597                        | 0.942 | 0.00166                                     | 0.975 |
| 4        | 0.04747                        | 0.927 | 0.00426                                     | 0.962 |
| 5        | 0.03979                        | 0.689 | 0.00263                                     | 0.923 |
| 6        | 0.04558                        | 0.727 | 0.00353                                     | 0.937 |
| 7        | 0.03538                        | 0.648 | 0.00206                                     | 0.934 |
| 8        | 0.03736                        | 0.602 | 0.00234                                     | 0.915 |
| 9        | 0.05395                        | 0.956 | 0.00479                                     | 0.958 |
| 10       | 0.03935                        | 0.630 | 0.00269                                     | 0.921 |
| 11       | 0.01423                        | 0.902 | 0.00042                                     | 0.913 |
| 12       | 0.00542                        | 0.861 | 0.00013                                     | 0.934 |

**Table S5.** Degradation kinetics parameters for different TCH concentrations.

| TCH concentration<br>(mg L <sup>-1</sup> ) | Pseudo-first-order model       |       | Pseudo-second-order model                   |       |
|--------------------------------------------|--------------------------------|-------|---------------------------------------------|-------|
|                                            | $k_{obs}$ (min <sup>-1</sup> ) | $R^2$ | $k$ (L mg <sup>-1</sup> min <sup>-1</sup> ) | $R^2$ |
| 10                                         | 0.06306                        | 0.903 | 0.05978                                     | 0.919 |
| 20                                         | 0.06264                        | 0.783 | 0.01467                                     | 0.965 |
| 30                                         | 0.06073                        | 0.803 | 0.00843                                     | 0.983 |
| 40                                         | 0.05991                        | 0.926 | 0.00672                                     | 0.937 |
| 50                                         | 0.05395                        | 0.956 | 0.00479                                     | 0.958 |
| 70                                         | 0.04772                        | 0.902 | 0.00191                                     | 0.933 |
| 90                                         | 0.03471                        | 0.889 | 0.00080                                     | 0.929 |

**Table S6.** Kinetic rate constants and activation energies of TCH degradation.

| $T$ (°C) | $k$ (L mg <sup>-1</sup> min <sup>-1</sup> ) | $R^2$ | $\Delta E$ (kJ mol <sup>-1</sup> ) |
|----------|---------------------------------------------|-------|------------------------------------|
| 25       | 0.00479                                     | 0.903 | 47.7                               |
| 40       | 0.01248                                     | 0.977 | /                                  |
| 55       | 0.02418                                     | 0.948 | /                                  |

**Table S7.** Characteristic parameters of the representative antibiotic molecules.

| Antibiotics type                 | Chemical structure                                                                  | Molecular size              | Molecular volume (nm <sup>3</sup> ) |
|----------------------------------|-------------------------------------------------------------------------------------|-----------------------------|-------------------------------------|
| Tetracycline hydrochloride (TCH) | 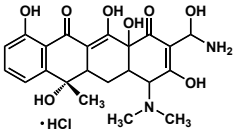   | 1.41 nm × 0.46 nm × 0.82 nm | 0.532                               |
| Doxycycline hydrochloride (DCH)  |  | 1.41 nm × 0.45 nm × 0.85 nm | 0.539                               |
| Methylene Blue (MB)              |  | 1.43 nm × 0.61 nm × 0.4 nm  | 0.349                               |
| Rhodamine B (RhB)                |  | 1.59 nm × 1.18 nm × 0.56 nm | 1.051                               |

**Table S8.** Degradation performance of Cu@C/SiO<sub>2</sub> NFMs towards TCH in comparison with state of art catalysts in literatures.

| Catalyst                                         | Reaction rate (min <sup>-1</sup> ) | Removal ability      | Reaction conditions                                                                                              | Ref.      |
|--------------------------------------------------|------------------------------------|----------------------|------------------------------------------------------------------------------------------------------------------|-----------|
| Cu@C/SiO <sub>2</sub> NFMs                       | 0.054                              | 95% within 40 min    | [Catalyst] = 0.3 g L <sup>-1</sup> ,<br>[persulfate] = 0.3 g L <sup>-1</sup> ,<br>[TCH] = 50 mg L <sup>-1</sup>  | This work |
|                                                  |                                    |                      |                                                                                                                  |           |
| Cu-FeOOH/BC                                      | 0.0178                             | 98% within 180 min   | [Catalyst] = 0.2 g L <sup>-1</sup> ,<br>[persulfate] = 20 mM,<br>[TCH] = 20 mg L <sup>-1</sup>                   | [1]       |
| Cu/CuFe <sub>2</sub> O <sub>4</sub>              | /                                  | 68.3% within 120 min | [Catalyst] = 0.3 g L <sup>-1</sup> ,<br>[persulfate] = 1.5 g L <sup>-1</sup> ,<br>[TCH] = 50 mg L <sup>-1</sup>  | [2]       |
| Activated carbon/Fe <sub>3</sub> O <sub>4</sub>  | 0.0058                             | 99.9% within 180 min | [Catalyst] = 0.2 g L <sup>-1</sup> ,<br>[persulfate] = 30 mM,<br>[TCH] = 50 mg L <sup>-1</sup>                   | [3]       |
| Ni <sub>x</sub> Fe <sub>3-x</sub> O <sub>4</sub> | 0.038                              | 85% within 35 min    | [Catalyst] = 0.35 g L <sup>-1</sup> ,<br>[persulfate] = 42 μM,<br>[TCH] = 20 mg L <sup>-1</sup>                  | [4]       |
| Fe/C                                             | 0.218                              | 92.1% within 12 min  | [Catalyst] = 0.2 g L <sup>-1</sup> ,<br>[persulfate] = 5 g L <sup>-1</sup> ,<br>[TCH] = 100 mg L <sup>-1</sup>   | [5]       |
| Co/BiFeO <sub>3</sub>                            | /                                  | 81.09% within 60 min | [Catalyst] = 0.5 g L <sup>-1</sup> ,<br>[persulfate] = 3.33 g L <sup>-1</sup> ,<br>[TCH] = 10 mg L <sup>-1</sup> | [6]       |

## Reference

1. J. Xu, X. Zhang, C. Sun, J. Wan, H. He, F. Wang, Y. Dai, S. Yang, Y. Lin, X. Zhan, *Environ. Sci. Pollut. Res.*, 2019, **26**, 2820-2834.
2. Z. Li, C. Guo, J. Lyu, Z. Hu, M. Ge, *J. Hazard. Mater.*, 2019, **373**, 85-96.
3. A. Jafari, B. Kakavandi, N. Jaafarzadeh, R. Kalantary, M. Ahmadi, A. Babaei, *J. Ind. Eng. Chem.*, 2017, **45**, 323-333.
4. R. Guan, X. Yuan, Z. Wu, H. Wang, L. Jiang, J. Zhang, Y. Li, G. Zeng, D. Mo, *Chem. Eng. J.*, 2018, **350**, 573-584.
5. X. Jiang, Y. Guo, L. Zhang, W. Jiang, R. Xie, *Chem. Eng. J.*, 2018, **341**, 392-401.
6. H. Zhang, S. Cheng, B. Li, X. Cheng, Q. Cheng, *Sep. Purif. Technol.*, 2018, **202**, 242-247.
